# Supplementary material
Source: Springer Nature journal article supplement (https://www.springermedizin.de/resource/supplementary/12889_2012_5122_MOESM3_ESM.pdf/9496672)
Supplement: MOESM3 [file 9496672]

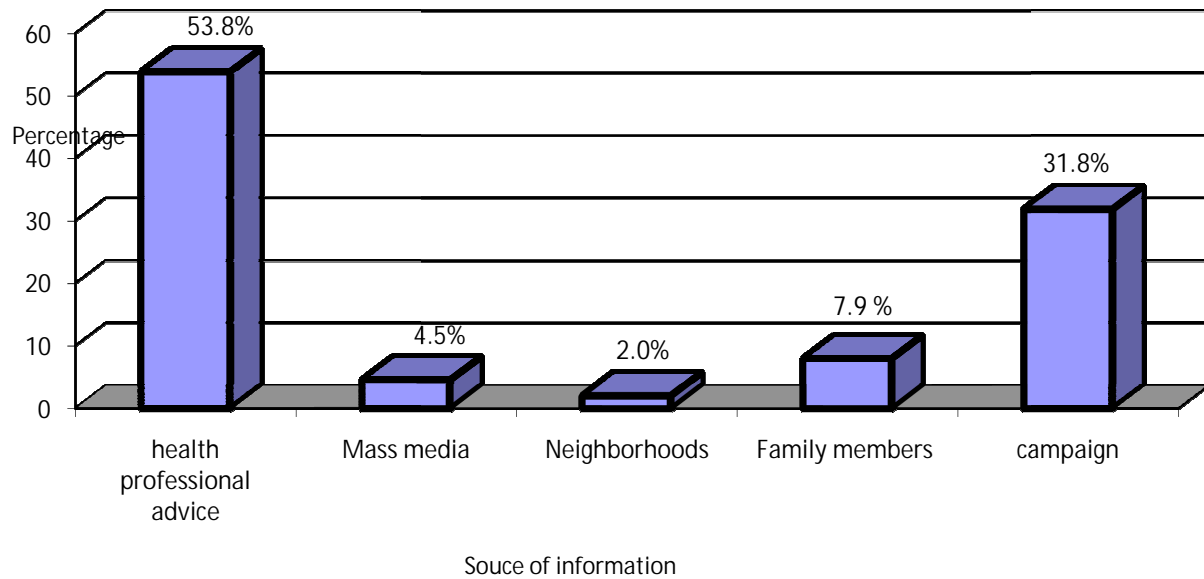

Figure 1: Source of information about the importance of latrine construction among the rural community of Bahir Dar Zuria District, May 2012. (n= 355).
